# Supplementary material for: Macrocycle supported dinuclear lanthanide complexes with different β-diketonate co-ligands displaying zero field single-molecule magnetic behaviour
Source: Royal Society of Chemistry journal article supplement (doi:10.1039/d2nj01017h), 2022-01-01
Supplement: d2nj01017h1.pdf [file d2nj01017h1.pdf]

## Supplementary Information

### Macrocycle supported dinuclear lanthanide complexes with different $\beta$ -diketonate co-ligands displaying zero field single-molecule magnetic behaviour

**Kuheli Pramanik,<sup>a,b</sup> Yu-Chen Sun,<sup>c</sup> Paula Brandão,<sup>d</sup> Narayan Ch. Jana,<sup>b</sup> Xin-Yi Wang,<sup>c</sup> and Anangamohan Panja <sup>\*a,b</sup>**

<sup>a</sup> Department of Chemistry, Gokhale Memorial Girls' College, 1/1 Harish Mukherjee Road, Kolkata 700020, India

<sup>b</sup> Department of Chemistry, Panskura Banamali College, Panskura RS, WB 721152, India. E-mail: ampanja@yahoo.co.in

<sup>c</sup> State Key Laboratory of Coordination Chemistry, Collaborative Innovation Center of Advanced Microstructures, School of Chemistry and Chemical Engineering, Nanjing University, Nanjing, 210023, China. E-mail: wangxy66@nju.edu.cn

<sup>d</sup> Department of Chemistry, CICECO-Aveiro Institute of Materials, University of Aveiro, 3810-193 Aveiro, Portugal

## Table of Contents

|                                                                                                                                                                                                                                                                                                                                                                                                                                                                                                                                                                            |    |
|----------------------------------------------------------------------------------------------------------------------------------------------------------------------------------------------------------------------------------------------------------------------------------------------------------------------------------------------------------------------------------------------------------------------------------------------------------------------------------------------------------------------------------------------------------------------------|----|
| <b>Fig. S1.</b> $^1\text{H}$ NMR spectrum of ligand HL in $\text{CDCl}_3$ at indicated temperatures .....                                                                                                                                                                                                                                                                                                                                                                                                                                                                  | 4  |
| <b>Fig. S2.</b> IR spectrum of ligand HL. ....                                                                                                                                                                                                                                                                                                                                                                                                                                                                                                                             | 4  |
| <b>Scheme S1.</b> Probable mechanism for the <i>in-situ</i> transformation of the Schiff base leading to the macrocyclic ligand. ....                                                                                                                                                                                                                                                                                                                                                                                                                                      | 5  |
| <b>Fig. S3.</b> Electrospray ionization mass spectra (ESI-MS positive) of a reaction mixture related to the synthesis of $\mathbf{2}_{\text{Dy}}$ recorded after 5 min showing an important intermediate species (a) and the final product after 2 h (b) and (c). ....                                                                                                                                                                                                                                                                                                     | 5  |
| <b>Fig. S4.</b> IR spectrum of $\mathbf{1}_{\text{Gd}}$ (ATR).....                                                                                                                                                                                                                                                                                                                                                                                                                                                                                                         | 6  |
| <b>Fig. S5.</b> IR spectrum of $\mathbf{2}_{\text{Dy}}$ (ATR). ....                                                                                                                                                                                                                                                                                                                                                                                                                                                                                                        | 6  |
| <b>Fig. S6.</b> IR spectrum of $\mathbf{3}_{\text{Gd}}$ (ATR).....                                                                                                                                                                                                                                                                                                                                                                                                                                                                                                         | 6  |
| <b>Fig. S7.</b> IR spectrum of $\mathbf{4}_{\text{Dy}}$ (ATR). ....                                                                                                                                                                                                                                                                                                                                                                                                                                                                                                        | 7  |
| <b>Fig. S8.</b> IR spectrum of $\mathbf{5}_{\text{Gd}}$ (ATR).....                                                                                                                                                                                                                                                                                                                                                                                                                                                                                                         | 7  |
| <b>Fig. S9.</b> IR spectrum of $\mathbf{6}_{\text{Dy}}$ (ATR). ....                                                                                                                                                                                                                                                                                                                                                                                                                                                                                                        | 7  |
| <b>Fig. S10.</b> Ellipsoid plots of $\mathbf{1}_{\text{Gd}}$ - $\mathbf{6}_{\text{Dy}}$ with all sorts of solvent molecules and disorder models.....                                                                                                                                                                                                                                                                                                                                                                                                                       | 8  |
| <b>Fig. S11.</b> SAPR coordination environment of complex $\mathbf{2}_{\text{Dy}}$ with the magic angle $\alpha$ between the $S_8$ axis and a Dy-L direction (left) and skew angle $\phi$ between the diagonals of the two squares (right). ....                                                                                                                                                                                                                                                                                                                           | 9  |
| <b>Fig. S12.</b> Packing structure of $\mathbf{2}_{\text{Dy}}$ complex, viewed along the $b$ -axis. Packing structure shows that the lattice contains a narrow 1-D pore channel along the $b$ -axis. Molecules are shown in spacefill model. ....                                                                                                                                                                                                                                                                                                                          | 9  |
| <b>Fig. S13.</b> Packing structure of $\mathbf{2}_{\text{Dy}}$ complex, viewed along the $b$ -axis. The pore channel is filled by disordered acetonitrile and water lattice solvent molecules, shown in spacefill model. Molecule is shown in capped stick model. ....                                                                                                                                                                                                                                                                                                     | 9  |
| <b>Fig. S14.</b> Plots of $\chi_M T$ versus $T$ under a 1000 Oe dc field in the temperature range of 2.0–300 K for three Gd complexes. Insert graph is Curie–Weiss analysis of the magnetic susceptibility data above 100 K with negative Weiss values. ....                                                                                                                                                                                                                                                                                                               | 10 |
| <b>Fig. S15</b> Plots of magnetization ( $M$ ) versus magnetic field ( $H$ ) at 2.0, 3.0 and 5.0 K in the field range of 0–7 T for three Gd complexes. ....                                                                                                                                                                                                                                                                                                                                                                                                                | 11 |
| <b>Fig. S16</b> Plots of magnetization ( $M$ ) versus magnetic field ( $H$ ) at 2.0 K in the field range of 0–7 T for three Dy complexes. ....                                                                                                                                                                                                                                                                                                                                                                                                                             | 11 |
| <b>Fig. S17</b> Cole–Cole plots for $\mathbf{2}_{\text{Dy}}$ (a) and $\mathbf{6}_{\text{Dy}}$ (b) under 0 Oe dc field. The solid lines are the best fits to the experiments with the generalized Debye model. Arrhenius plot with the $\ln(\tau)$ vs. $T^{-1}$ for $\mathbf{2}_{\text{Dy}}$ (c) and $\mathbf{6}_{\text{Dy}}$ (d). Red lines show fits of the data to the Arrhenius law $\tau = \tau_0 \exp(U_{\text{eff}}/kBT)$ , assuming the Orbach relaxation process. Blue lines represent fits to all the data considering other possible processes as indicated..... | 11 |
| <b>Fig. S18</b> Cole–Cole plots for $\mathbf{4}_{\text{Dy}}$ under zero dc field (a) and at 1000 Oe dc field (b). The solid lines are the best fits to the experiments with the generalized Debye model. ....                                                                                                                                                                                                                                                                                                                                                              | 12 |
| <b>Fig. S19</b> (a) Frequency dependence and (b) temperature dependence of the in-phase and out-of-phase parts of the ac magnetic susceptibilities for $\mathbf{4}_{\text{Dy}}$ collected at 1000 Oe dc field at 2.0 K to 15.0 K. ....                                                                                                                                                                                                                                                                                                                                     | 12 |

**Fig. 20.** Ground state magnetic anisotropy of complexes **2<sub>Dy</sub>** (a), **4<sub>Dy</sub>** (b) and **6<sub>Dy</sub>** (c). The Green rods represent the orientations of the anisotropy axes for each of the Dy<sup>III</sup> ion in these complexes calculated by Magellan programme.....13

**Table S1.** Crystallographic data and refinement parameters of the complexes .....14

**Table S2.** SHAPE analysis of the Ln<sup>III</sup> ion in complexes **1<sub>Gd</sub>**–**6<sub>Dy</sub>**. .....15

**Table S3** Relaxation fitting parameters from the least-square fitting of the Cole-Cole plots of **2<sub>Dy</sub>** under a 0 Oe dc field at 2.0-8.5 K according to the generalized Debye model. ....15

**Table S4** Relaxation fitting parameters from the least-square fitting of the Cole-Cole plots of **4<sub>Dy</sub>** under a 0 Oe dc field at 2.0-8.5 K according to the generalized Debye model. ....16

**Table S5** Relaxation fitting parameters from the least-square fitting of the Cole-Cole plots of **4<sub>Dy</sub>** under a 1000 Oe dc field at 2.0-8.5 K according to the generalized Debye model. ....17

**Table S6** Relaxation fitting parameters from the least-square fitting of the Cole-Cole plots of **6<sub>Dy</sub>** under a zero Oe dc field at 2.0-8.5 K according to the generalized Debye model. ....17

**Table S7** Parameters fitted from the Arrhenius relationship for **2<sub>Dy</sub>**, **4<sub>Dy</sub>** and **6<sub>Dy</sub>** considering only the Orbach process.....18

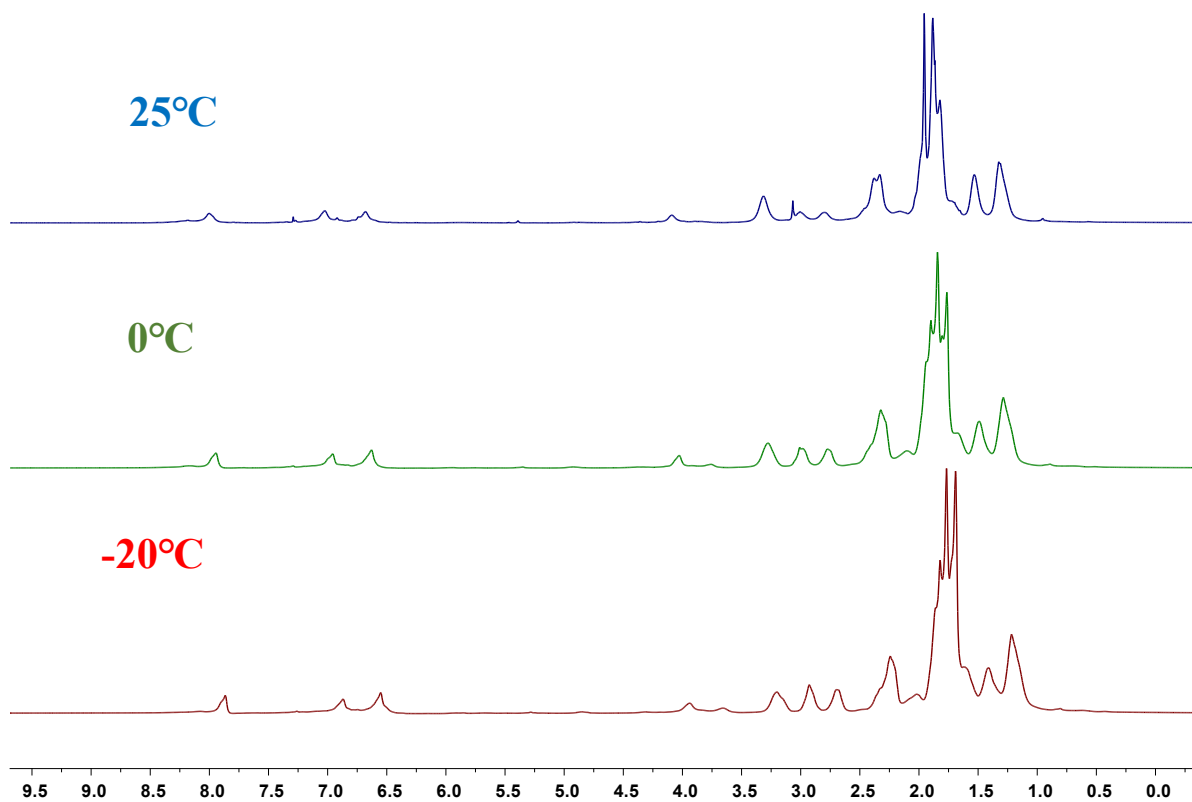

**Fig. S1.**  $^1\text{H}$  NMR spectrum of ligand HL in  $\text{CDCl}_3$  at indicated temperatures

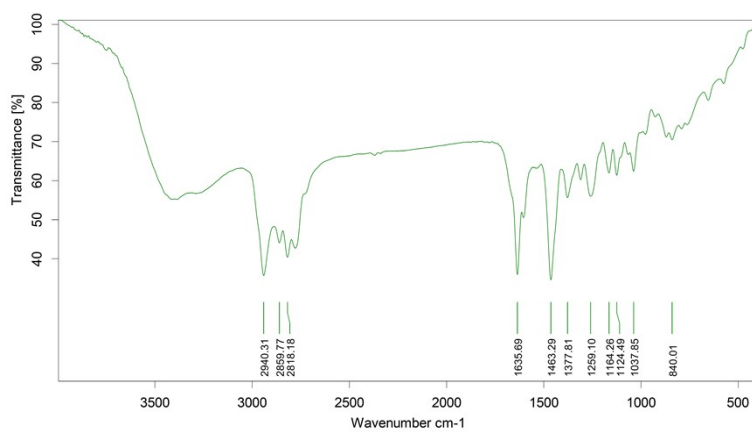

**Fig. S2.** IR spectrum of ligand HL.

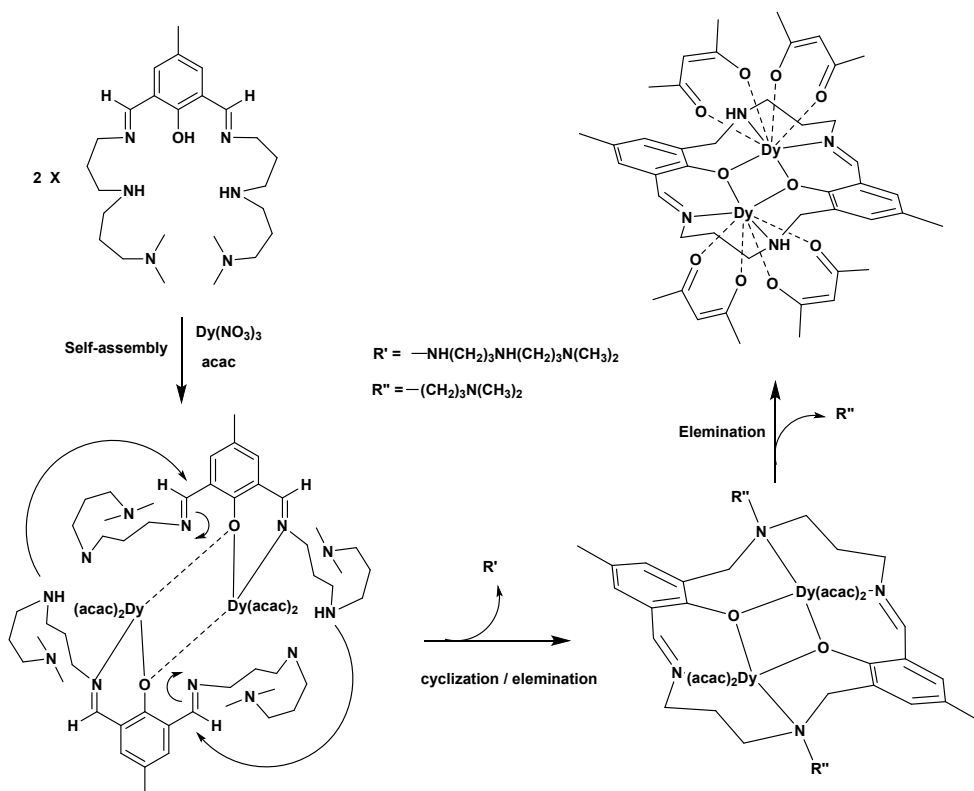

**Scheme S1.** Probable mechanism for the *in-situ* transformation of the Schiff base leading to the macrocyclic ligand.

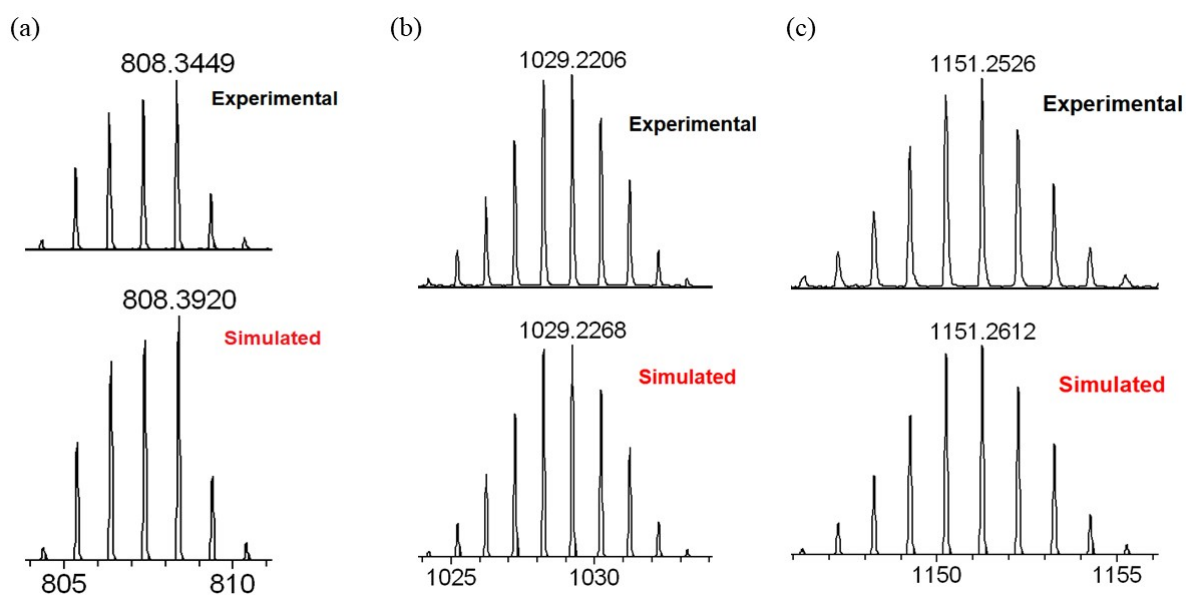

**Fig. S3.** Electrospray ionization mass spectra (ESI-MS positive) of a reaction mixture related to the synthesis of **2<sub>Dy</sub>** recorded after 5 min showing an important intermediate species (a) and the final product after 2 h (b) and (c).

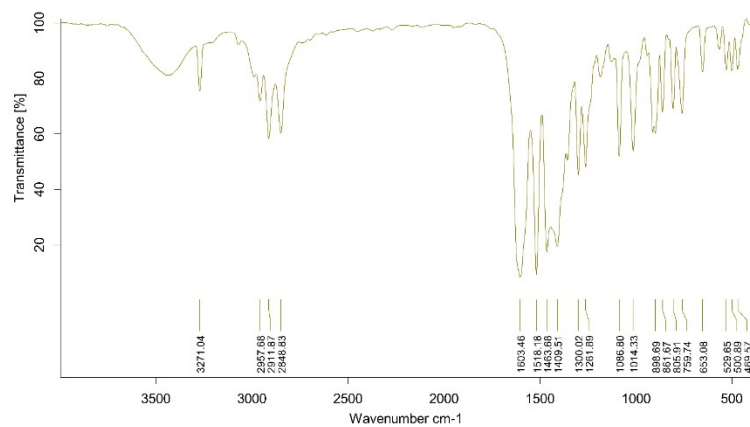

**Fig. S4.** IR spectrum of **1<sub>Gd</sub>** (ATR).

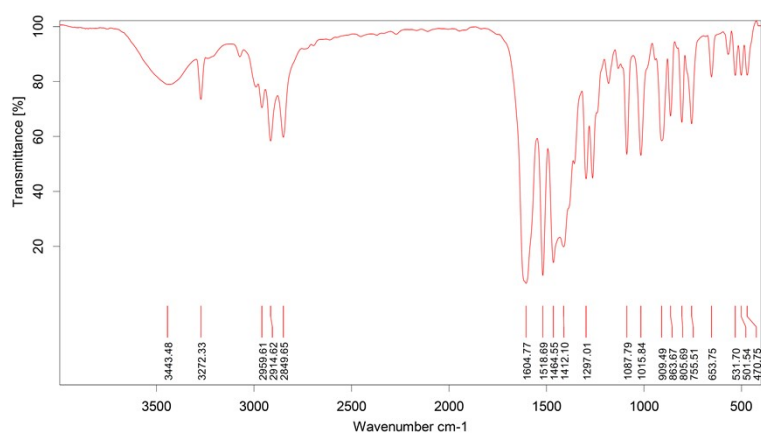

**Fig. S5.** IR spectrum of **2<sub>Dy</sub>** (ATR).

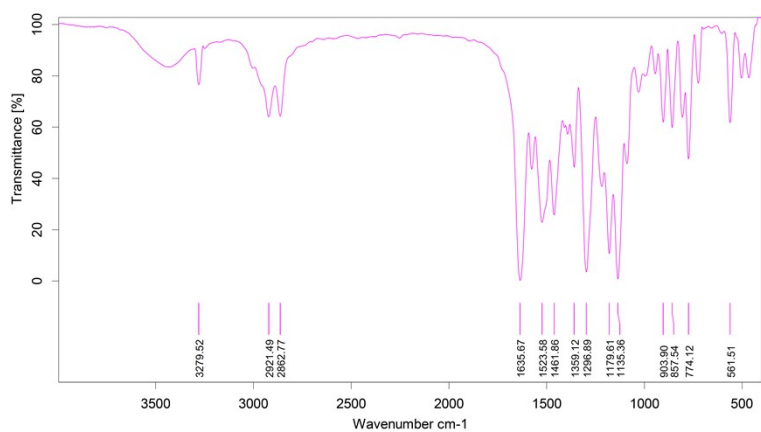

**Fig. S6.** IR spectrum of **3<sub>Gd</sub>** (ATR).

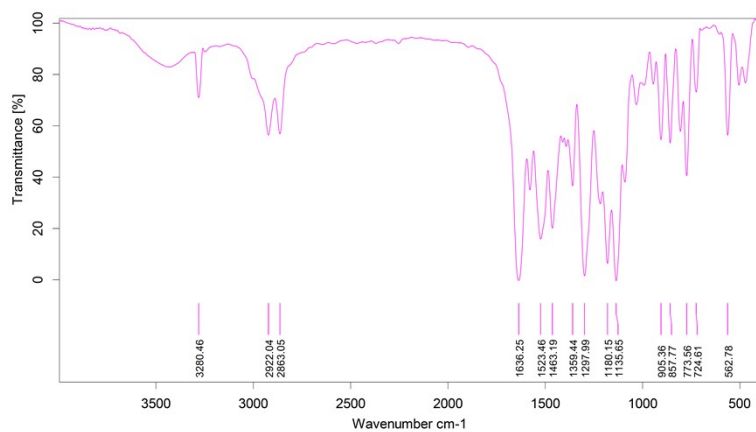

**Fig. S7.** IR spectrum of **4<sub>Dy</sub>** (ATR).

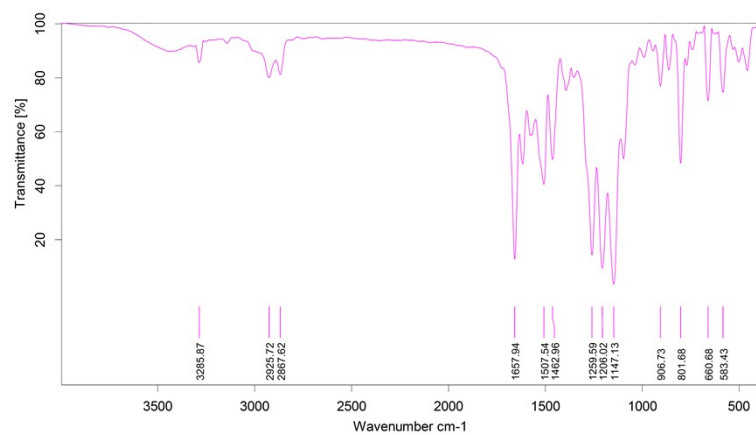

**Fig. S8.** IR spectrum of **5<sub>Cd</sub>** (ATR).

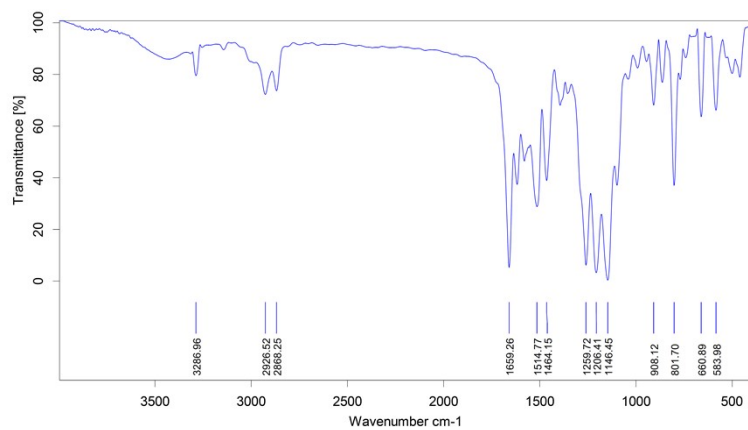

**Fig. S9.** IR spectrum of **6<sub>Dy</sub>** (ATR).

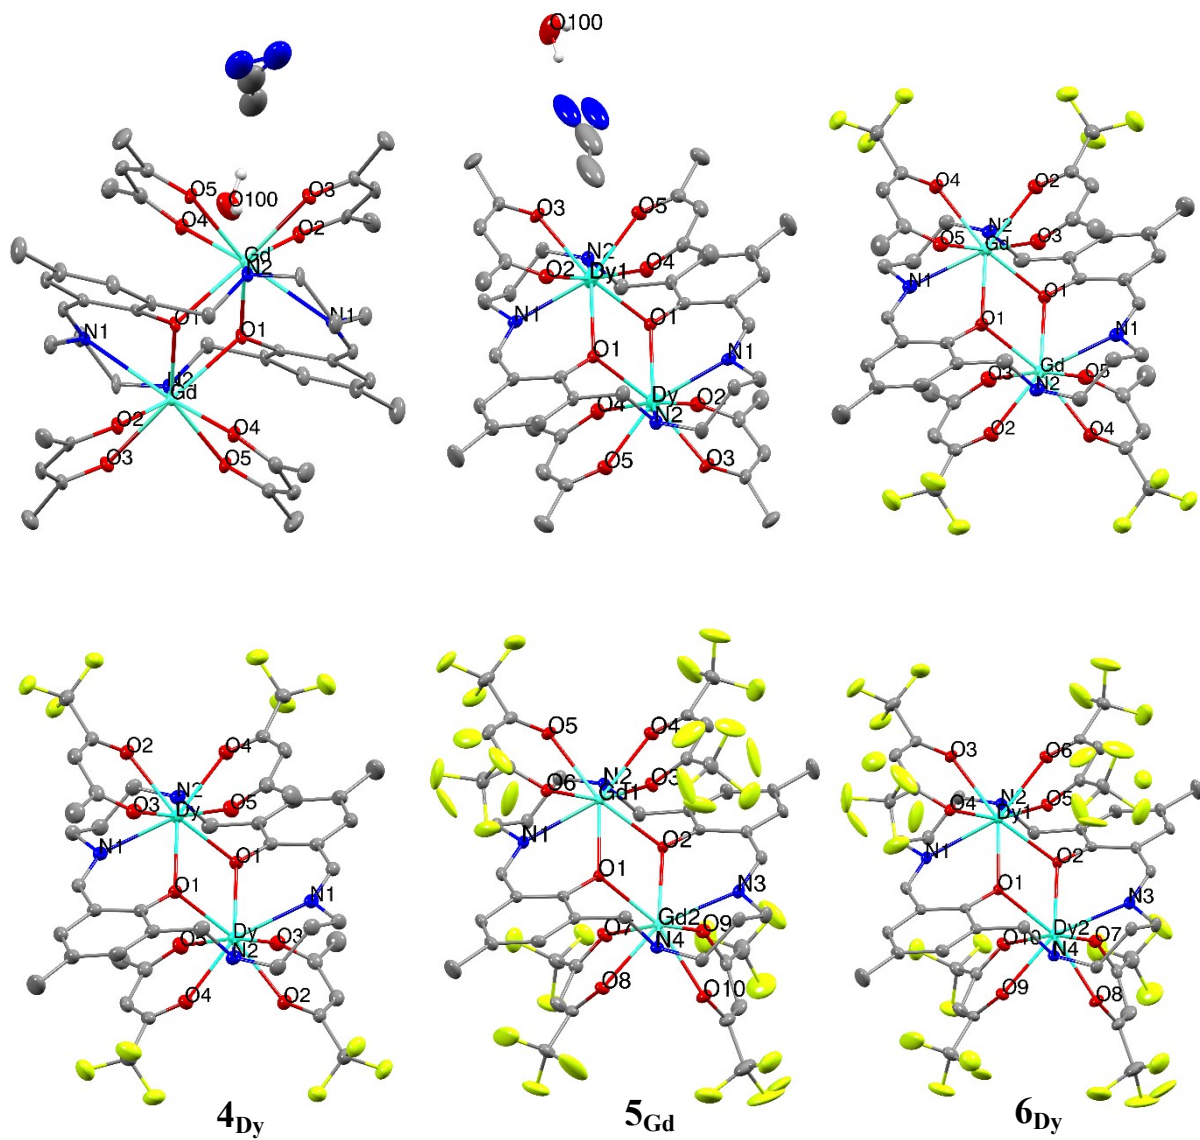

**Fig. S10.** Ellipsoid plots (30 % probability) of  $1_{\text{Gd}}$  -  $6_{\text{Dy}}$  with all sorts of solvent molecules and disorder models



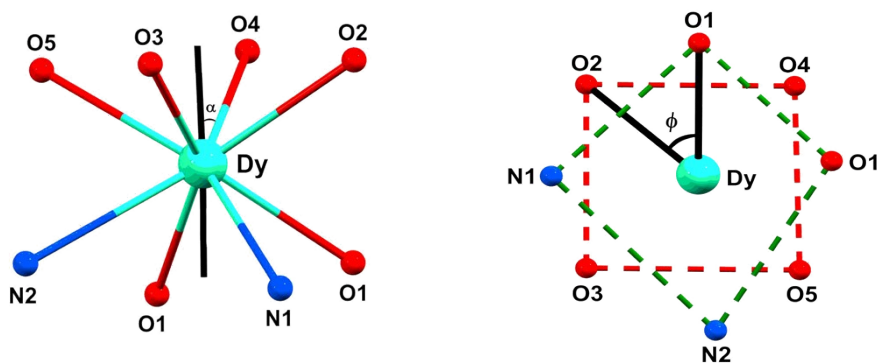

**Fig. S11.** SAPR coordination environment of complex  $2_{Dy}$  with the magic angle  $\alpha$  between the  $S_8$  axis and a Dy-L direction (left) and skew angle  $\phi$  between the diagonals of the two squares (right).

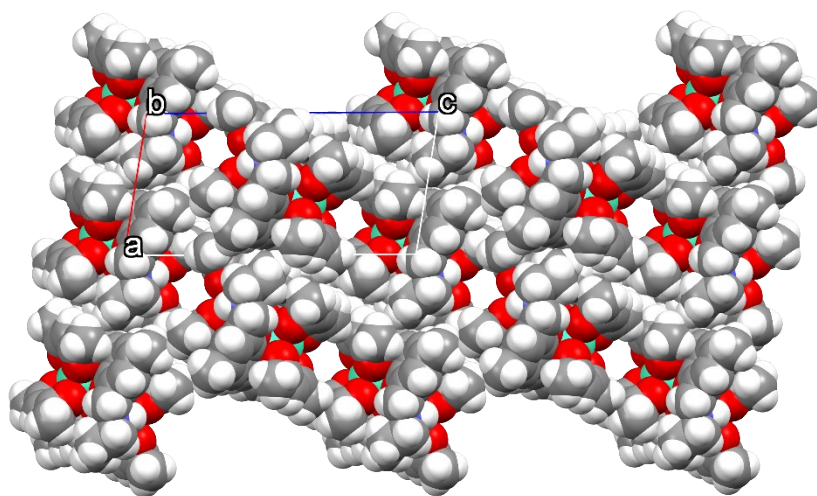

**Fig. 12.** Packing structure of  $2_{Dy}$  complex, viewed along the  $b$ -axis. Packing structure shows that the lattice contains a narrow 1-D pore channel along the  $b$ -axis. Molecules are shown in spacefill model.

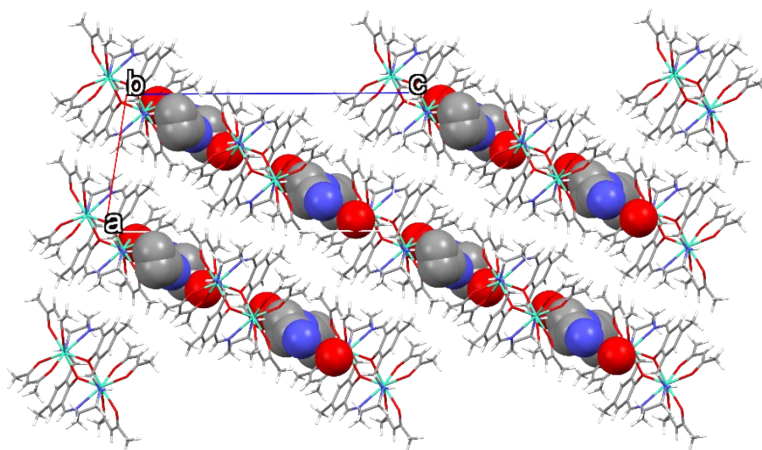

**Fig. 13.** Packing structure of  $2_{Dy}$  complex, viewed along the  $b$ -axis. The pore channel is filled by disordered acetonitrile and water lattice solvent molecules, shown in spacefill model. Molecule is shown in capped stick model.

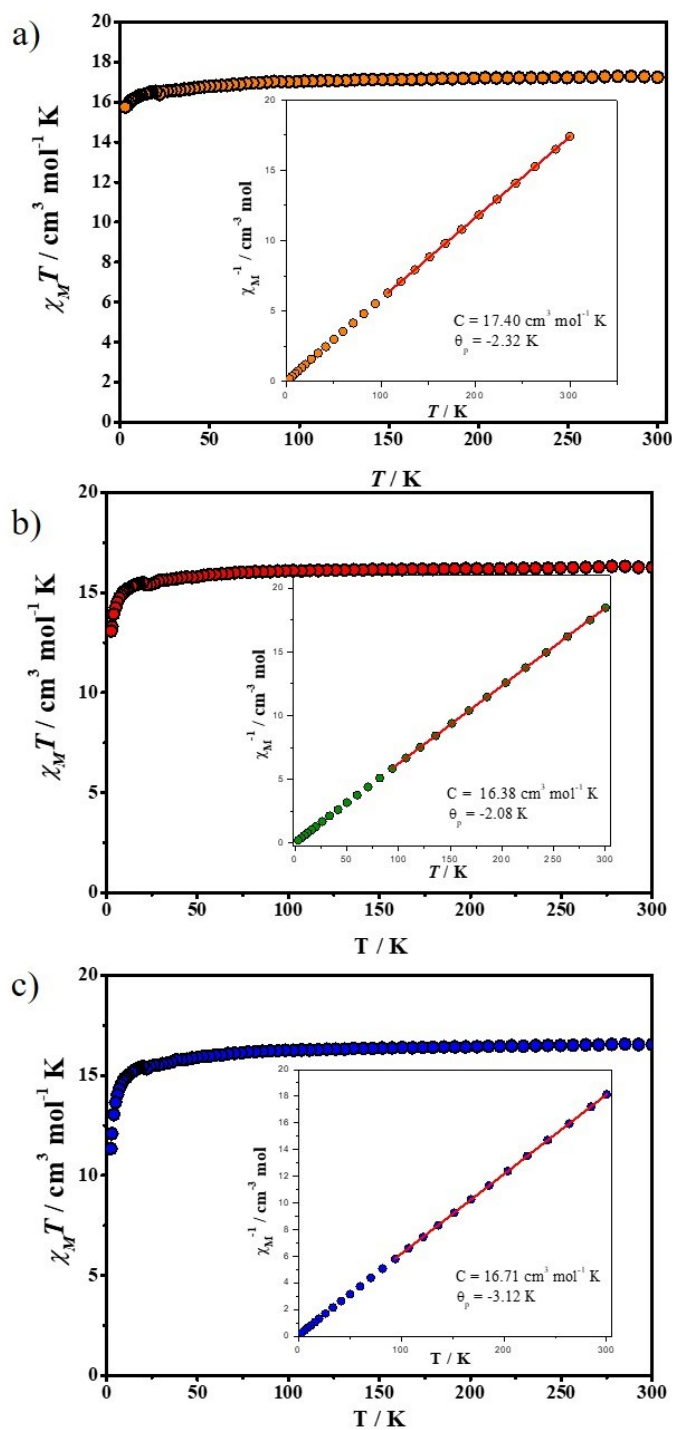

**Fig. S14.** (a)-(c) Plots of  $\chi_M T$  versus  $T$  under a 1000 Oe dc field in the temperature range of 2.0–300 K for three Gd complexes  $\mathbf{1}_{\text{Gd}}$ ,  $\mathbf{3}_{\text{Gd}}$  and  $\mathbf{5}_{\text{Gd}}$ , respectively. Insert graph is Curie–Weiss analysis of the magnetic susceptibility data above 100 K with negative Weiss values.

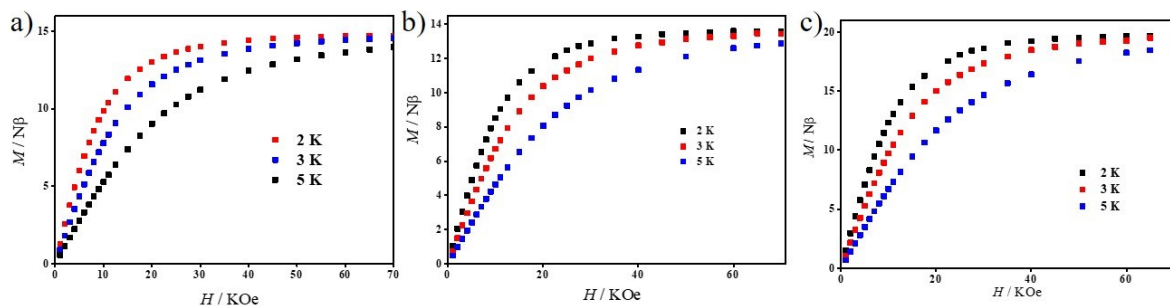

**Fig. S15** Plots of magnetization ( $M$ ) versus magnetic field ( $H$ ) at 2.0, 3.0 and 5.0 K in the field range of 0–7 T for three Gd complexes.

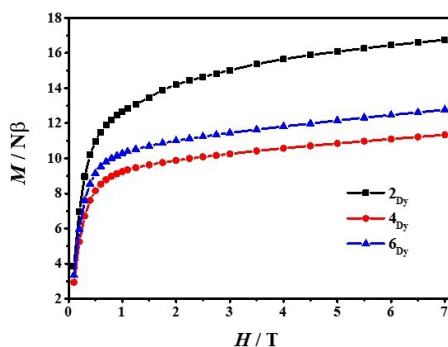

**Fig. S16** Plots of magnetization ( $M$ ) versus magnetic field ( $H$ ) at 2.0 K in the field range of 0–7 T for three Dy complexes.

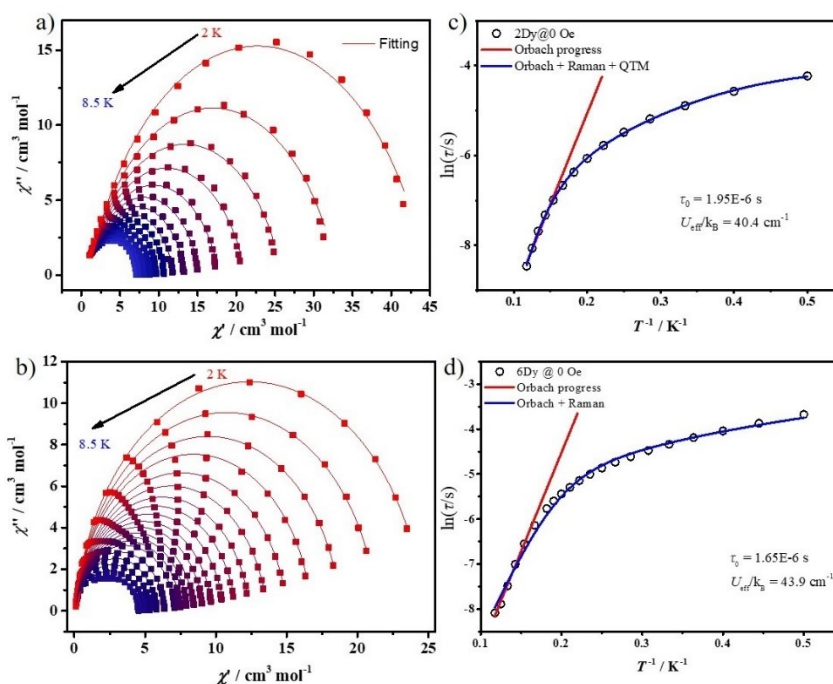

**Fig. S17** Cole–Cole plots for  $2_{Dy}$  (a) and  $6_{Dy}$  (b) under 0 Oe dc field. The solid lines are the best fits to the experiments with the generalized Debye model. Arrhenius plot with the  $\ln(\tau)$  vs.  $T^{-1}$  for for  $2_{Dy}$  (c) and  $6_{Dy}$  (d). Red lines show fits of the data to the Arrhenius law  $\tau = \tau_0 \cdot \exp(U_{eff}/kBT)$ , assuming the Orbach relaxation process. Blue lines represent fits to all the data considering other possible processes as indicated.

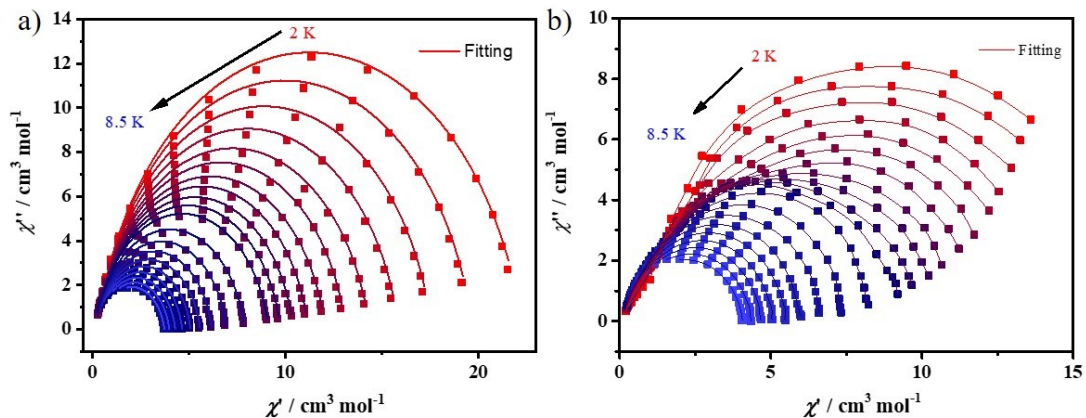

**Fig. S18** Cole–Cole plots for  $4\text{Dy}$  under zero dc field (a) and at 1000 Oe dc field (b). The solid lines are the best fits to the experiments with the generalized Debye model.

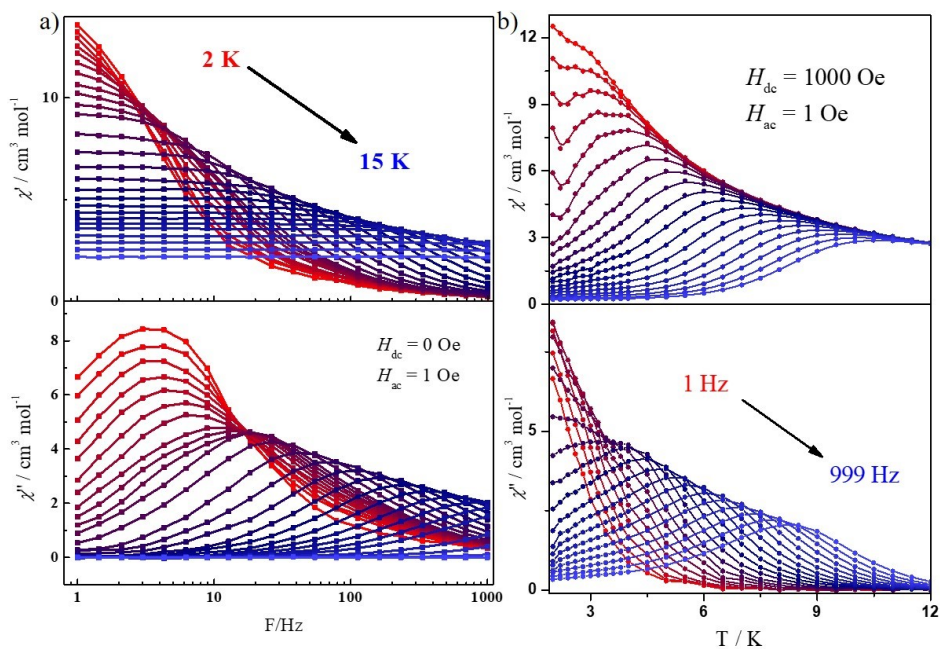

**Fig. S19** (a) Frequency dependence and (b) temperature dependence of the in-phase and out-of-phase parts of the ac magnetic susceptibilities for  $4\text{Dy}$  collected at 1000 Oe dc field at 2.0 K to 15.0 K.

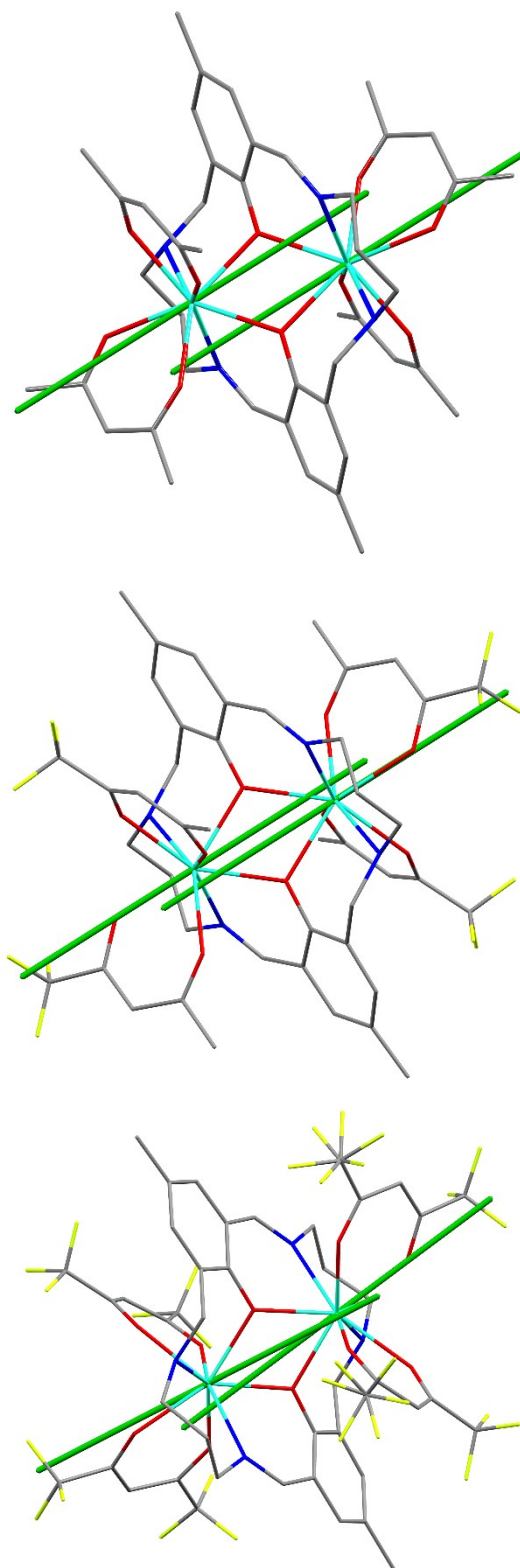

**Fig. 20.** Ground state magnetic anisotropy of complexes **2<sub>Dy</sub>** (a), **4<sub>Dy</sub>** (b) and **6<sub>Dy</sub>** (c). The Green rods represent the orientations of the anisotropy axes for each of the Dy<sup>III</sup> ion in these complexes calculated by Magellan programme.

**Table S1.** Crystallographic data and refinement parameters of the complexes

|                                             | <b>1<sub>Gd</sub></b>                                                          | <b>2<sub>Dy</sub></b>                                                          | <b>3<sub>Gd</sub></b>                                                                          | <b>4<sub>Dy</sub></b>                                                                          | <b>5<sub>Gd</sub></b>                                                                          | <b>6<sub>Dy</sub></b>                                                                          |
|---------------------------------------------|--------------------------------------------------------------------------------|--------------------------------------------------------------------------------|------------------------------------------------------------------------------------------------|------------------------------------------------------------------------------------------------|------------------------------------------------------------------------------------------------|------------------------------------------------------------------------------------------------|
| CCDC No.                                    |                                                                                |                                                                                |                                                                                                |                                                                                                |                                                                                                |                                                                                                |
| Empirical formula                           | C <sub>48</sub> H <sub>66</sub> Gd <sub>2</sub> N <sub>6</sub> O <sub>11</sub> | C <sub>48</sub> H <sub>66</sub> Dy <sub>2</sub> N <sub>6</sub> O <sub>11</sub> | C <sub>44</sub> H <sub>46</sub> Gd <sub>2</sub> N <sub>4</sub> O <sub>10</sub> F <sub>12</sub> | C <sub>44</sub> H <sub>46</sub> Dy <sub>2</sub> N <sub>4</sub> O <sub>10</sub> F <sub>12</sub> | C <sub>44</sub> H <sub>34</sub> Gd <sub>2</sub> N <sub>4</sub> O <sub>10</sub> F <sub>24</sub> | C <sub>44</sub> H <sub>34</sub> Dy <sub>2</sub> N <sub>4</sub> O <sub>10</sub> F <sub>24</sub> |
| Formula weight                              | 1217.56                                                                        | 1228.06                                                                        | 1333.35                                                                                        | 1343.85                                                                                        | 1549.25                                                                                        | 1559.75                                                                                        |
| Crystal system                              | monoclinic                                                                     | monoclinic                                                                     | monoclinic                                                                                     | monoclinic                                                                                     | monoclinic                                                                                     | monoclinic                                                                                     |
| Space group                                 | P2 <sub>1</sub> /n                                                             | P2 <sub>1</sub> /n                                                             | P2 <sub>1</sub> /n                                                                             | P2 <sub>1</sub> /n                                                                             | P2 <sub>1</sub> /c                                                                             | P2 <sub>1</sub> /c                                                                             |
| <i>a</i> /Å                                 | 10.9193(5)                                                                     | 10.8976(5)                                                                     | 12.3866(5)                                                                                     | 12.3307(4)                                                                                     | 17.5215(5)                                                                                     | 17.4671(7)                                                                                     |
| <i>b</i> /Å                                 | 10.7257(6)                                                                     | 10.7327(5)                                                                     | 15.8527(7)                                                                                     | 15.7913(5)                                                                                     | 15.8691(4)                                                                                     | 15.8149(6)                                                                                     |
| <i>c</i> /Å                                 | 22.1996(11)                                                                    | 22.0512(10)                                                                    | 12.3961(5)                                                                                     | 12.3988(4)                                                                                     | 19.1889(5)                                                                                     | 19.2355(8)                                                                                     |
| $\beta$ /°                                  | 99.344(4)                                                                      | 99.464(3)                                                                      | 98.654(2)                                                                                      | 99.045(2)                                                                                      | 91.384(2)                                                                                      | 91.169(2)                                                                                      |
| Volume/Å <sup>3</sup>                       | 2565.5(2)                                                                      | 2544.0(2)                                                                      | 2406.40(17)                                                                                    | 2384.25(13)                                                                                    | 5333.9(2)                                                                                      | 5312.5(4)                                                                                      |
| <i>Z</i>                                    | 2                                                                              | 2                                                                              | 2                                                                                              | 2                                                                                              | 4                                                                                              | 4                                                                                              |
| $\rho_{\text{calc}}/\text{cm}^3$            | 1.576                                                                          | 1.603                                                                          | 1.840                                                                                          | 1.872                                                                                          | 1.929                                                                                          | 1.950                                                                                          |
| $\mu/\text{mm}^{-1}$                        | 2.625                                                                          | 2.977                                                                          | 2.839                                                                                          | 3.217                                                                                          | 2.607                                                                                          | 2.934                                                                                          |
| <i>F</i> (000)                              | 1224                                                                           | 1232                                                                           | 1308                                                                                           | 1316                                                                                           | 3000                                                                                           | 3016                                                                                           |
| $\theta$ range/°                            | 1.859 to 27.138                                                                | 1.873 to 27.190                                                                | 2.100 to 29.181                                                                                | 2.105 to 27.182                                                                                | 1.162 to 29.192                                                                                | 1.166 to 29.190                                                                                |
| Reflections collected                       | 16870                                                                          | 5922                                                                           | 34099                                                                                          | 34008                                                                                          | 93576                                                                                          | 80677                                                                                          |
| Independent reflections                     | 5615 [R <sub>int</sub> = 0.0591]                                               | 5922 [R <sub>int</sub> = 0.0731]                                               | 6500 [R <sub>int</sub> = 0.0608]                                                               | 5250 [R <sub>int</sub> = 0.0492]                                                               | 14424 [R <sub>int</sub> = 0.0567]                                                              | 14323 [R <sub>int</sub> = 0.0538]                                                              |
| Data/restraints/parameters                  | 4114/3/303                                                                     | 4968/8/310                                                                     | 4645/0/332                                                                                     | 4336/1/332                                                                                     | 11070/20/832                                                                                   | 11194/14/839                                                                                   |
| Goodness-of-fit on <i>F</i> <sup>2</sup>    | 1.027                                                                          | 1.033                                                                          | 1.016                                                                                          | 1.027                                                                                          | 1.026                                                                                          | 1.009                                                                                          |
| Final <i>R</i> indexes [I ≥ 2σ (I)]         | <i>R</i> <sub>1</sub> = 0.0462,<br><i>wR</i> <sub>2</sub> = 0.0965             | <i>R</i> <sub>1</sub> = 0.0569,<br><i>wR</i> <sub>2</sub> = 0.1353             | <i>R</i> <sub>1</sub> = 0.0353,<br><i>wR</i> <sub>2</sub> = 0.0670                             | <i>R</i> <sub>1</sub> = 0.0261,<br><i>wR</i> <sub>2</sub> = 0.0605                             | <i>R</i> <sub>1</sub> = 0.0323,<br><i>wR</i> <sub>2</sub> = 0.0560                             | <i>R</i> <sub>1</sub> = 0.0318,<br><i>wR</i> <sub>2</sub> = 0.0611                             |
| Final <i>R</i> indexes [all data]           | <i>R</i> <sub>1</sub> = 0.0756,<br><i>wR</i> <sub>2</sub> = 0.1078             | <i>R</i> <sub>1</sub> = 0.0709,<br><i>wR</i> <sub>2</sub> = 0.1465             | <i>R</i> <sub>1</sub> = 0.0637,<br><i>wR</i> <sub>2</sub> = 0.0765                             | <i>R</i> <sub>1</sub> = 0.0367,<br><i>wR</i> <sub>2</sub> = 0.0660                             | <i>R</i> <sub>1</sub> = 0.0529,<br><i>wR</i> <sub>2</sub> = 0.0627                             | <i>R</i> <sub>1</sub> = 0.0497,<br><i>wR</i> <sub>2</sub> = 0.0680                             |
| Largest diff. peak/hole / e Å <sup>-3</sup> | 1.661/-1.257                                                                   | 3.498/-2.331                                                                   | 0.965/-0.676                                                                                   | 0.790/-0.506                                                                                   | 1.009/-0.739                                                                                   | 1.273/-1.041                                                                                   |

**Table S2.** SHAPE analysis of the Ln<sup>III</sup> ion in complexes **1<sub>Dy</sub>-6<sub>Gd</sub>**.

| Label    | Shape                                      | Symmetry | <b>1<sub>Gd</sub></b> | <b>2<sub>Dy</sub></b> | <b>3<sub>Gd</sub></b> | <b>4<sub>Dy</sub></b> | <b>5<sub>Gd</sub></b> | <b>6<sub>Dy</sub></b> |              |              |
|----------|--------------------------------------------|----------|-----------------------|-----------------------|-----------------------|-----------------------|-----------------------|-----------------------|--------------|--------------|
| OP-8     | Octagon                                    | $D_{8h}$ | 30.367                | 30.201                | 30.126                | 29.910                | 30.196                | 30.015                | 30.011       | 30.650       |
| HPY-8    | Heptagonal pyramid                         | $C_{7v}$ | 22.803                | 23.090                | 23.010                | 23.138                | 22.350                | 22.993                | 22.494       | 23.100       |
| HBPY-8   | Hexagonal bipyramid                        | $D_{6h}$ | 15.495                | 15.624                | 15.162                | 15.343                | 15.459                | 14.856                | 15.612       | 15.122       |
| CU-8     | Cube                                       | $O_h$    | 9.643                 | 9.678                 | 8.760                 | 8.915                 | 9.714                 | 9.295                 | 9.819        | 9.484        |
| SAPR-8   | Square antiprism                           | $D_{4d}$ | <b>1.015</b>          | <b>0.976</b>          | <b>0.908</b>          | <b>0.866</b>          | <b>0.880</b>          | <b>1.079</b>          | <b>0.842</b> | <b>1.023</b> |
| TDD-8    | Triangular dodecahedron                    | $D_{2d}$ | 2.078                 | 2.109                 | 1.947                 | 1.975                 | 2.213                 | 2.125                 | 2.183        | 2.128        |
| JGBF-8   | Johnson gyrobifastigium J26                | $D_{2d}$ | 14.811                | 14.873                | 15.127                | 15.216                | 15.049                | 14.189                | 15.112       | 14.327       |
| JETBPY-8 | Johnson elongated triangular bipyramid J14 | $C_{3h}$ | 27.524                | 27.583                | 27.104                | 27.266                | 27.172                | 27.241                | 27.304       | 27.265       |
| JBTPR-8  | Biaugmented trigonal prism J50             | $C_{2v}$ | 2.225                 | 2.238                 | 2.672                 | 2.650                 | 2.547                 | 2.849                 | 2.557        | 2.862        |
| BTPR-8   | Biaugmented trigonal prism                 | $C_{2v}$ | 1.729                 | 1.809                 | 2.146                 | 2.167                 | 2.031                 | 2.071                 | 2.079        | 2.056        |
| JSD-8    | Snub diphenoid J84                         | $D_{2d}$ | 4.490                 | 4.515                 | 5.075                 | 5.020                 | 4.500                 | 4.376                 | 4.470        | 4.381        |
| TT-8     | Triakis tetrahedron                        | $T_d$    | 10.436                | 10.470                | 9.598                 | 9.749                 | 10.543                | 10.092                | 10.630       | 10.271       |
| ETBPY-8  | Elongated trigonal bipyramid               | $D_{3h}$ | 22.933                | 23.061                | 22.455                | 22.652                | 22.650                | 22.853                | 22.860       | 22.926       |

**Table S3** Relaxation fitting parameters from the least-square fitting of the Cole-Cole plots of **2<sub>Dy</sub>** under a 0 Oe dc field at 2.0-8.5 K according to the generalized Debye model.

| $T / K$ | $\chi_S / \text{cm}^3\text{mol}^{-1}\text{K}$ | $\chi_T / \text{cm}^3\text{mol}^{-1}\text{K}$ | $\tau / \text{s}$ | $\alpha$ |
|---------|-----------------------------------------------|-----------------------------------------------|-------------------|----------|
| 2.0     | 0.99350                                       | 44.52550                                      | 0.01459           | 0.21507  |
| 2.5     | 0.88434                                       | 32.97310                                      | 0.01036           | 0.22121  |
| 3.0     | 0.86286                                       | 25.87344                                      | 0.00751           | 0.21862  |
| 3.5     | 0.86035                                       | 21.17176                                      | 0.00561           | 0.21448  |
| 4.0     | 0.85785                                       | 17.78734                                      | 0.00416           | 0.20957  |
| 4.5     | 0.90351                                       | 15.33025                                      | 0.00311           | 0.19958  |
| 5.0     | 0.95815                                       | 13.45134                                      | 0.00232           | 0.18936  |
| 5.5     | 1.01975                                       | 11.91325                                      | 0.00171           | 0.17720  |
| 6.0     | 1.09496                                       | 10.75745                                      | 0.00127           | 0.16617  |
| 6.5     | 1.15327                                       | 9.73973                                       | 9.19901E-4        | 0.15600  |
| 7.0     | 1.24263                                       | 8.92938                                       | 6.58684E-4        | 0.14493  |
| 7.5     | 1.33613                                       | 8.21976                                       | 4.59592E-4        | 0.13488  |
| 8.0     | 1.42255                                       | 7.63612                                       | 3.14415E-4        | 0.12988  |
| 8.5     | 1.52758                                       | 7.11068                                       | 2.1121E-4         | 0.12180  |



**Table S4** Relaxation fitting parameters from the least-square fitting of the Cole-Cole plots of  $4_{Dy}$  under a 0 Oe dc field at 2.0-8.5 K according to the generalized Debye model.

| $T / K$ | $\chi_S / \text{cm}^3\text{mol}^{-1}\text{K}$ | $\chi_T / \text{cm}^3\text{mol}^{-1}\text{K}$ | $\tau / \text{s}$ | $\alpha$ |
|---------|-----------------------------------------------|-----------------------------------------------|-------------------|----------|
| 2.0     | 0.22465                                       | 22.26788                                      | 0.01235           | 0.13306  |
| 2.2     | 0.23750                                       | 19.68974                                      | 0.01079           | 0.12182  |
| 2.4     | 0.22855                                       | 17.56987                                      | 0.00960           | 0.11826  |
| 2.6     | 0.19820                                       | 15.86716                                      | 0.00875           | 0.12104  |
| 2.8     | 0.18444                                       | 14.34189                                      | 0.00777           | 0.12163  |
| 3.0     | 0.19669                                       | 13.11307                                      | 0.00706           | 0.11535  |
| 3.2     | 0.17709                                       | 12.05449                                      | 0.00641           | 0.11755  |
| 3.4     | 0.19816                                       | 11.17365                                      | 0.00579           | 0.11066  |
| 3.6     | 0.16872                                       | 10.41820                                      | 0.00531           | 0.11634  |
| 3.8     | 0.17871                                       | 9.73975                                       | 0.00481           | 0.11346  |
| 4.0     | 0.16187                                       | 9.12499                                       | 0.00436           | 0.11633  |
| 4.5     | 0.16703                                       | 7.87638                                       | 0.00331           | 0.11367  |
| 5.0     | 0.17965                                       | 6.94075                                       | 0.00246           | 0.11149  |
| 5.5     | 0.19306                                       | 6.16914                                       | 0.00178           | 0.10897  |
| 6.0     | 0.20282                                       | 5.56782                                       | 0.00126           | 0.11136  |
| 6.5     | 0.23429                                       | 5.06509                                       | 8.85029E-4        | 0.10996  |
| 7.0     | 0.27348                                       | 4.63379                                       | 6.13115E-4        | 0.10812  |
| 7.5     | 0.30798                                       | 4.27560                                       | 4.23371E-4        | 0.11094  |
| 8.0     | 0.35831                                       | 3.96373                                       | 2.90294E-4        | 0.11202  |
| 8.5     | 0.38254                                       | 3.71027                                       | 1.96181E-4        | 0.12457  |



**Table S5** Relaxation fitting parameters from the least-square fitting of the Cole-Cole plots of  $4_{Dy}$  under a 1000 Oe dc field at 2.0-8.5 K according to the generalized Debye model.

| $T/K$ | $\chi_S / \text{cm}^3\text{mol}^{-1}\text{K}$ | $\chi_T / \text{cm}^3\text{mol}^{-1}\text{K}$ | $\tau / \text{s}$ | $\alpha$ |
|-------|-----------------------------------------------|-----------------------------------------------|-------------------|----------|
| 2.0   | 4.13868E-14                                   | 22.2108                                       | 0.06957           | 0.23962  |
| 2.2   | 4.92233E-14                                   | 21.2496                                       | 0.06924           | 0.25628  |
| 2.4   | 9.437E-14                                     | 19.5193                                       | 0.05829           | 0.26395  |
| 2.6   | 1.34918E-13                                   | 18.0294                                       | 0.04624           | 0.27801  |
| 2.8   | 2.00018E-13                                   | 16.7949                                       | 0.03815           | 0.28976  |
| 3.0   | 3.85775E-13                                   | 14.9469                                       | 0.02771           | 0.26382  |
| 3.2   | 5.3708E-13                                    | 13.7376                                       | 0.02166           | 0.25916  |
| 3.4   | 8.9624E-13                                    | 12.5071                                       | 0.01641           | 0.25905  |
| 3.6   | 1.0281E-12                                    | 11.6786                                       | 0.01366           | 0.23823  |
| 3.8   | 1.59975E-12                                   | 10.8375                                       | 0.01093           | 0.21652  |
| 4.0   | 2.57318E-12                                   | 10.1279                                       | 0.00852           | 0.18941  |
| 4.5   | 4.74762E-12                                   | 8.88421                                       | 0.00541           | 0.15962  |
| 5.0   | 8.74319E-12                                   | 7.74808                                       | 0.00334           | 0.12681  |
| 5.5   | 1.45765E-11                                   | 6.90561                                       | 0.00214           | 0.11102  |
| 6.0   | 2.65448E-11                                   | 6.18039                                       | 0.00139           | 0.09756  |
| 6.5   | 5.31108E-11                                   | 5.63134                                       | 9.15526E-4        | 0.08231  |
| 7.0   | 8.80143E-11                                   | 5.15889                                       | 6.15776E-4        | 0.07493  |
| 7.5   | 1.41107E-10                                   | 4.74827                                       | 4.17905E-4        | 0.06527  |
| 8.0   | 2.23511E-10                                   | 4.39588                                       | 2.87853E-4        | 0.0571   |
| 8.5   | 4.34836E-10                                   | 1.08991                                       | 2.01024E-4        | 0.05218  |

**Table S6** Relaxation fitting parameters from the least-square fitting of the Cole-Cole plots of  $6_{Dy}$  under a zero Oe dc field at 2.0-8.5 K according to the generalized Debye model.

| $T/K$ | $\chi_S / \text{cm}^3\text{mol}^{-1}\text{K}$ | $\chi_T / \text{cm}^3\text{mol}^{-1}\text{K}$ | $\tau / \text{s}$ | $\alpha$ |
|-------|-----------------------------------------------|-----------------------------------------------|-------------------|----------|
| 2.0   | 0.10135                                       | 24.62746                                      | 0.02541           | 0.06737  |
| 2.2   | 0.09377                                       | 21.37005                                      | 0.02086           | 0.0685   |
| 2.5   | 0.08631                                       | 18.80932                                      | 0.01759           | 0.06922  |
| 2.7   | 0.09556                                       | 16.72003                                      | 0.01517           | 0.06222  |
| 3.0   | 0.07358                                       | 15.0065                                       | 0.01306           | 0.07373  |
| 3.2   | 0.06987                                       | 13.57511                                      | 0.01138           | 0.07437  |
| 3.5   | 0.07205                                       | 12.36927                                      | 0.00994           | 0.07417  |
| 3.7   | 0.07786                                       | 11.37886                                      | 0.00877           | 0.07262  |
| 4.0   | 0.07995                                       | 10.52561                                      | 0.00772           | 0.07251  |
| 4.2   | 0.07607                                       | 9.73978                                       | 0.00671           | 0.07325  |
| 4.5   | 0.08428                                       | 9.08421                                       | 0.00584           | 0.07032  |
| 4.7   | 0.07982                                       | 8.47095                                       | 0.00502           | 0.07051  |
| 5.0   | 0.08878                                       | 7.98016                                       | 0.00434           | 0.06833  |
| 5.2   | 0.09149                                       | 7.53222                                       | 0.00371           | 0.06754  |
| 5.5   | 0.0811                                        | 7.11841                                       | 0.00314           | 0.07127  |
| 6.0   | 0.08639                                       | 6.39961                                       | 0.00216           | 0.07222  |
| 6.5   | 0.07563                                       | 5.82483                                       | 0.00413           | 0.08548  |
| 7.0   | 0.05691                                       | 5.34813                                       | 9.0612E-4         | 0.11209  |
| 7.5   | 0.0798                                        | 4.93755                                       | 5.61986E-4        | 0.14665  |
| 8.0   | 0.28165                                       | 4.58862                                       | 3.75357E-4        | 0.17324  |
| 8.5   | 0.8145                                        | 4.27318                                       | 3.079E-4          | 0.14959  |

**Table S7** Parameters fitted from the Arrhenius relationship for  $2_{Dy}$ ,  $4_{Dy}$  and  $6_{Dy}$  considering only the Orbach process.

| complexes                        | $2_{Dy}$    | $4_{Dy}$    | $6_{Dy}$     |
|----------------------------------|-------------|-------------|--------------|
| dc field                         | 0 Oe        | 0 Oe        | 1000 Oe      |
| $\tau_0$ /s                      | 1.95E-6     | 1.61E-6     | 1.53E-6      |
| $U_{eff}$ / K(cm <sup>-1</sup> ) | 58.1 (40.4) | 59.9 (41.3) | 60.11 (41.8) |
| R <sup>2</sup>                   | 0.9972      | 0.9916      | 0.9999       |

**Table S8** Parameters fitted for  $2_{Dy}$ ,  $4_{Dy}$  and  $6_{Dy}$  by considering multiple relaxation processes using

$$\frac{1}{\tau} = \tau_{QTM}^{-1} + CT^n + \frac{1}{\tau_0} e^{-\frac{U_{eff}}{T}} \quad \text{and} \quad \frac{1}{\tau} = CT^n + \frac{1}{\tau_0} e^{-\frac{U_{eff}}{T}}$$

for the zero-field and 1 kOe dc field data.

| complexes                             | $2_{Dy}$    | $4_{Dy}$    | $6_{Dy}$    |
|---------------------------------------|-------------|-------------|-------------|
| dc field                              | 0 Oe        | 0 Oe        | 1000 Oe     |
| $\tau_0$ /s                           | 3.17E-7     | 1.68E-7     | 1.00E-7     |
| $U_{eff}$ / K(cm <sup>-1</sup> )      | 60.1 (41.8) | 61.5 (45.7) | 60.0 (41.7) |
| $C$ / s <sup>-1</sup> K <sup>-n</sup> | 2.4         | 23.5        | 10          |
| $n$                                   | 3.1         | 1.7         | 4.0         |
| $\tau_{QTM}$                          | 1.40E-2     | 1.20E-2     | -           |
| R <sup>2</sup>                        | 0.9998      | 0.9992      | 0.9946      |
